# Supplementary material for: Stress-Activated Protein Kinase Signalling Regulates Mycoparasitic Hyphal-Hyphal Interactions in Trichoderma atroviride
Source: J Fungi (Basel). 2021 May 6;7(5):365. doi: 10.3390/jof7050365 (PMC8148604; doi:10.3390/jof7050365)
Supplement: Supplementary file 1 [file jof-07-00365-s001.zip]

Archive with 19 entries (19 files):
- Fig S1_new_300dpi.tif
- Fig S2_new_300dpi.tif
- Fig S3_new_300dpi.tif
- Fig S4_300dpi.tif
- Fig S5_300dpi.tif
- Fig S6_new_300dpi.tif
- Figure_S7.tif
- jof-1210169 suppl.pdf
- Video S1.avi
- Video S2.avi
- Video S3.avi
- Video S4.avi
- Video S5.avi
- Video S6.avi
- Video S7.avi
- Video S8.avi
- Video S9.avi
- Video S10.avi
- Video S11.avi
